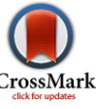

## Correction

# Correction: School and Community-Based Interventions for Refugee and Asylum Seeking Children: A Systematic Review

The *PLOS ONE* Staff

## Notice of Republication

This article was republished on April 25th, 2014, due to figures and tables being incorrectly left out of the article or duplicated in the Supporting Information. The publisher apologizes for this error. Please download the PDF again to view the corrected article. The originally published, uncorrected article and the republished, corrected article are provided here for reference.

## Supporting Information

**File S1.** Originally published, uncorrected article.

**File S2.** Republished, corrected article

## Reference

1. Tyrer RA, Fazel M (2014) School and Community-Based Interventions for Refugee and Asylum Seeking Children: A Systematic Review. *PLoS ONE* 9(2): e89359. doi:10.1371/journal.pone.0089359

---

**Citation:** The *PLOS ONE* Staff (2014) Correction: School and Community-Based Interventions for Refugee and Asylum Seeking Children: A Systematic Review. *PLoS ONE* 9(5): e97977. doi:10.1371/journal.pone.0097977

**Published:** May 12, 2014

**Copyright:** © 2014 The *PLOS ONE* Staff. This is an open-access article distributed under the terms of the Creative Commons Attribution License, which permits unrestricted use, distribution, and reproduction in any medium, provided the original author and source are credited.
